# Supplementary material
Source: publisher figshare collection journal article supplement (https://geolsoc.figshare.com/ndownloader/files/5422262)
Supplement: Supplementary file 1 [file 5422262]

Table 9
Caption: Response ANOVA analysis GenTot
Factor	Degrees of freedom	Sum Sq	Mean Sq	F value	Pr(>F)
Heat Flow	1	137184530.3	137184530.3	156.28	0
Porosity	1	1462912.13	1462912.13	1.67	0.2122
Fault 3	1	170818.88	170818.88	0.19	0.6641
TOC	1	86240549.48	86240549.48	98.25	0
Residuals	19	16678025.75	877790.83
